# Supplementary material for: Comparative analysis of a sex chromosome from the blackchin tilapia, Sarotherodon melanotheron
Source: BMC Genomics. 2016 Oct 18;17:808. doi: 10.1186/s12864-016-3163-7 (PMC5070092; doi:10.1186/s12864-016-3163-7)
Supplement: Additional file 3: — Shared sex-patterned SNPs between O. niloticus and S. melanotheron within intergenic region and the genes on either side of each shared sex-patterned SNP. *These shared sex-patterned SNPs had a gene on one side and the end of the scaffold on the other side (XLSX 32 kb) [file 12864_2016_3163_MOESM3_ESM.xlsx]

## Sheet: S_mel_O_nil_XY_Intergenic_Share
Chromosome	Position	Frequency of SNP in male S. melanotheron pool	Frequency of SNP in male O. niloticus pool	Nearby Gene	Accession Number	Distance (bp)	SNP relative to Gene Direction
LG1	11306154	0.384615	0.4	polypeptide N-acetylgalactosaminyltransferase 18-like	XM_003442373.2	-18830	Upstream
				BTB (POZ) domain containing 10, transcript variant 3	XM_005467007.1	69273	Upstream
LG1	11400015	0.441176	0.413793	BTB (POZ) domain containing 10, transcript variant 1	XM_005467005.1	-16403	Downstream
				BTB (POZ) domain containing 10, transcript variant 2	XM_005467006.1	-16403	Downstream
				BTB (POZ) domain containing 10, transcript variant 3	XM_005467007.1	-16403	Downstream
				ras association domain-containing protein 10-like	XM_003442372.2	4839	Downstream
LG1	14895959	0.357143	0.482759	Reticulocalbin-1-like, transcript variant 2	XM_005467162.1	-4786	Upstream
				Paired box protein Pax-6-like, transcript variant 2	XM_003442231.2	19482	Upstream
LG1	15706662	0.432836	0.411765	Uncharacterized LOC100699007, transcript variant 2	XM_003442225.2	-3889	Upstream
				KIF1-binding protein homolog	XM_003442223.2	1607	Downstream
LG1	17166204	0.545455	0.545455	Estrogen-related receptor gamma-like, transcript variant 1	XM_003454507.2	-49779	Upstream
				Estrogen-related receptor gamma-like, transcript variant 2	XM_005458973.1	-49779	Upstream
				Spermatogenesis-associated protein 17-like, transcript variant 1	XM_003454509.2	147740	Upstream
				Spermatogenesis-associated protein 17-like, transcript variant 2	XM_005458974.1	147740	Upstream
				Spermatogenesis-associated protein 17-like, transcript variant 3	XM_005458975.1	147740	Upstream
				Spermatogenesis-associated protein 17-like, transcript variant 4	XM_005458976.1	147740	Upstream
				Spermatogenesis-associated protein 17-like, transcript variant 5	XM_005458977.1	147740	Upstream
				Spermatogenesis-associated protein 17-like, transcript variant 6	XM_005458978.1	147740	Upstream
LG1	17245217	0.342105	0.473684	Estrogen-related receptor gamma-like, transcript variant 1	XM_003454507.2	-128792	Upstream
				Estrogen-related receptor gamma-like, transcript variant 2	XM_005458973.1	-128792	Upstream
				Spermatogenesis-associated protein 17-like, transcript variant 1	XM_003454509.2	68727	Upstream
				Spermatogenesis-associated protein 17-like, transcript variant 2	XM_005458974.1	68727	Upstream
				Spermatogenesis-associated protein 17-like, transcript variant 3	XM_005458975.1	68727	Upstream
				Spermatogenesis-associated protein 17-like, transcript variant 4	XM_005458976.1	68727	Upstream
				Spermatogenesis-associated protein 17-like, transcript variant 5	XM_005458977.1	68727	Upstream
				Spermatogenesis-associated protein 17-like, transcript variant 6	XM_005458978.1	68727	Upstream
LG1	17900697	0.307692	0.5	Glioma tumor suppressor candidate region gene 1 protein-like	XM_005447872.1	-24079	Downstream
				Serine/threonine/tyrosine-interacting protein-like	XM_003437715.2	206055	Upstream
LG1	18042712	0.40678	0.527778	Glioma tumor suppressor candidate region gene 1 protein-like	XM_005447872.1	-166094	Downstream
				Serine/threonine/tyrosine-interacting protein-like	XM_003437715.2	64040	Upstream
LG14	23018650	0.352941	0.305556	Dehydrogenase/reductase SDR family member 11-like	XM_003440139.2	-6479	Upstream
				Glutathione S-transferase omega-1-like	XM_003440140.2	4954	Upstream
UNK52	647335	0.461538	0.35	Uncharacterized LOC100701592	XM_005461845.1	-478750	Upstream
				Uncharacterized protein LOC102083129	XM_005461844.1	411625	Upstream
UNK78*	854090	0.321429	0.307692	Transmembrane 9 superfamily member 1-like	XM_003457889.2	-33891	Downstream
UNK215*	312458	0.416667	0.363636	Uncharacterized LOC102077023	XM_005465129.1	-132907	Downstream
UNK248	144703	0.4	0.5	RNA-binding protein 4.1-like, transcript variant 2	XM_005465387.1	-56	Upstream
				Uncharacterized LOC102082561	XM_005465388.1	73094	Upstream
